# Supplementary material
Source: publisher figshare collection journal article supplement (https://gsapubs.figshare.com/ndownloader/files/22759337)
Supplement: Supplementary file 1 [file 22759337]

## **DATA REPOSITORY 2009273**

### **SAMPLING AND ANALYTICAL METHODS, PLUS COMPILATION OF DISCHARGE COMPOSITION OF SEAFLOOR BLACK SMOKERS**

The deep liquid at Reykjanes was sampled in May, 2007, from the only three wells that were available that were also vertical; deviated wells have the potential for the down-hole sampler tool, unique in the world (Simmons and Brown, 2006, 2007), to become stuck. Two wells are fitted with slotted liners, open to the reservoir through the slots, that extend below the solid production casing (from depths of 763 and 611 m in RN19 and 21, respectively), whereas the third well (RN-12) has no slotted liner, just an open hole below the solid production casing (base at 854 m). Bottom depths of the wells are 2506 m (RN12), 2235 m (RN19), and 1664 m (RN21). All three wells were sampled during a short period of power station maintenance, with the wells discharging at a very low rate, 3-5 kg/s, to prevent non-condensable gases from accumulating; normal production flow rates are ~110 kg/sec. The pressure and temperature in the wells were logged using a Kuster K-10 tool, less than 4 hours prior to sampling. In each case the depth of sampling was at least 150 m below the boiling level in the well, as defined by the change in slope of the measured pressure (Fig. 2). This change in slope is due to the transition from liquid to a boiling, two-phase mixture at ~1300 m depth, above which the vapor phase controls the pressure profile.

A titanium down-hole sampler, designed specifically to provide reservoir liquid samples for trace element analysis (particularly metals), was used to collect the deep liquid, as previously

described by Brown and Simmons (2003) and Simmons and Brown (2006, 2007). After lowering the sampler to the sample depth, it was opened by an inertial trigger; the internal volume of the sampler is 800 ml. Although the deep liquid samples were collected below the boiling zone, contamination by previously precipitated metal sulfide, either well bore scale or particulate (colloidal) sulfide suspended in the boiling zone, cannot be totally ruled out (although the narrow range of trace element concentrations from the three separate wells argue against ingestion of foreign particles; Fig. 3). Simmons and Brown (2007) showed that blanks using this down-hole sampler indicate little or no contamination when samples are being collected; in addition, because the samples were collected below the boiling level (Fig. 2), the presence of scales at this depth is not likely. All components of the sample vessel in contact with the liquid are titanium. Copper seals in the sampler are isolated from the liquid sample by viton O-rings. These O-rings are replaced before each sampling.

The sealed container prevents the liquid from boiling on ascent to the surface, by the use of a non-return valve so the sample maintains the same pressure as that collected; there was no evidence of leakage during recovery of the samples. At the surface the sampler was cooled below atmospheric boiling point by pouring cold water on its exterior, after which the sampler was opened and the solution collected (425-625 ml). All liquid samples were greyish in color due to the suspension of fine precipitates, assumed to have formed after sampling, due to mineral saturation (largely sulfides) on cooling. The sampler was then rinsed with 40 ml aqua regia to dissolve any precipitate that may have adhered to the internal titanium wall of the vessel, followed by rinsing with 40 ml of distilled water; this was repeated again with acid and distilled water. The total diluent (160 ml) was added to the original sample, and this dilution was later corrected for in the final reported analyses (Table 1).

Samples were analyzed at CSIRO Australia, Lucas Heights. Analytical methods include: CSIRO; Ag, Au, Be, Bi, Br, Cd, Co, Cr, Cu, I, Mo, Ni, Pb, Sb, Sn, Te, Tl, V, W by ICP-MS (Inductively coupled plasma-Mass spectrometry), B, Ba, Ca, Cu, Fe, K, Na, Li, Mg, Mn, Na, S, Si, Sr, Zn by ICP-OES (Inductively coupled plasma-Optical emission), As and Se by Hydride-AAS (Atomic absorption spectrometric) analysis, Hg by AFS (Atomic fluorescence spectroscopy). The pH, CO<sub>2</sub>, H<sub>2</sub>S and SO<sub>4</sub> were not measured in the downhole samples due to acid addition upon sample retrieval. Surface-collected fluids have pH measured in the field, and are then analyzed by the Iceland GeoSurvey (B, Br, Cl, K, Mg, Na, SiO<sub>2</sub>, CO<sub>2</sub>, H<sub>2</sub>S and SO<sub>4</sub> by spectrophotometer, ion chromatography, AAS) and at ALS Scandinavia AB Sweden (Al, Ba, Sr, Li, I and trace elements by ICP-SFMS, ICP-AES, ICP-SMS).

Surface samples are collected 2–3 m downstream of the wellhead, at pressures of 28–32.5 bar absolute (i.e., equivalent to 230–238°C, respectively) from the production wells at regular intervals for production monitoring purposes by the Iceland GeoSurvey. These samples consist of liquid and vapor phases of known proportion, determined from sample pressure and discharge enthalpy (Henley et al., 1984), with volatile species largely fractionated into the vapor sample. After analysis of all major components, including gases, from both samples they are recombined to provide the composition of the reservoir liquid, prior to boiling, using standard methods (Henley et al., 1984); a typical H<sub>2</sub>S concentration in the reservoir liquid is 0.8 mM (sample collected at the surface from RN19). The surface samples of liquid are also analyzed for their trace element composition (a typical composition from RN19 is given in Table 1, corrected for concentration due to vapor loss at the sample point, i.e., equivalent to reservoir concentrations except for elemental changes due to precipitation on ascent prior to sampling).

## References Cited:

- Brown, K.L., and Simmons, S.F., 2003, Precious metals in high-temperature geothermal systems in New Zealand: *Geothermics*, v. 32, p. 619-625.
- Butterfield, D.A., Massoth, G.J., McDuff, R.E., Lupton, J.E., and Lilley, M.D., 1990, Geochemistry of hydrothermal fluids from Axial Seamount hydrothermal emissions study vent field, Juan de Fuca Ridge: Subseafloor boiling and subsequent fluid-rock interaction: *Journal of Geophysical Research*, v. 95, p. 12,895-12,921.
- Douville, E., Charlou, J.L., Oelkers, E.H., Bienvenu, P., Jove Colon, C.F., Donval, J. P., Fouquet, Y., Prieur, D. and Appriou, P., 2002, The Rainbow vent fluids (36°14'N, MAR): the influence of ultramafic rocks and phase separation on trace metal content in Mid-Atlantic Ridge hydrothermal fluids: *Chemical Geology*, v. 184, p. 37-48.
- Gallant, R.M. and Von Damm, K.L., 2006, Geochemical controls on hydrothermal fluids from the Kairei and Edmond vent fields, 23°-25°S, Central Indian ridge: *Geochemistry Geophysics Geosystems*, v. 6, p. 1-24, doi:10.1029/2005GC001067.
- Henley, R.W., Truesdell, A.H., and Barton, P.B., Jr., 1984, Fluid-Mineral Equilibria in Hydrothermal Systems: *Reviews in Economic Geology*, v. 1, 267 p.
- Koschinsky, A., Garbe-Schönberg, D., Sander, S., Schmidt, K., Gennerich, H-H, and Strauss, H., 2008, Hydrothermal venting at pressure-temperature conditions above the critical point of seawater, 5°S on the Mid-Atlantic Ridge: *Geology*, v. 36, p. 615-618.
- Simmons, S.F. and Brown, K.L., 2006, Gold in magmatic hydrothermal solutions and the rapid formation of giant ore deposits: *Science*, v. 314, p. 288-291.

Simmons, S.F. and Brown, K.L., 2007, The flux of gold and related metals through a volcanic arc, Taupo Volcanic Zone, New Zealand: *Geology*, v. 35, p 1099-1102.

Von Damm, K.L., Bray, A.M., Buttermore, L.G., Oosting, S.E., 1998, The geochemical controls on vent fluids for the Lucky Strike vent field, Mid-Atlantic Ridge: *Earth and Planetary Science Letters* v. 160, p. 521-536.

Von Damm, K.L., Lilley, M.D., Shanks III, W.C., Brockington, M., Bray, A.M., O'Grady, K.M., Olson, E., Graham, A., Proskurowski, G., and the SouEPR Science Party, 2003, Extraordinary phase separation and segregation in vent fluids from the southern East Pacific Rise: *Earth and Planetary Sciences Letters*, v. 206, p. 365-378.

TABLE DR1. MAJOR AND TRACE ELEMENT CONCENTRATIONS FROM  
SELECTED SEAFLOOR BLACK SMOKER VENTS

|                       | Axial<br>Seamount <sup>†</sup> | Lucky Strike<br>Effel <sup>†,§</sup> | Lucky<br>Strike<br>Crystal <sup>†,§</sup> | Rainbow <sup>§</sup> | Logatchev <sup>§</sup> | Menez<br>Gwen <sup>§</sup> | Broken<br>Spur <sup>§</sup> | Snakepit <sup>§</sup> | TAG <sup>†</sup> | Red Lion <sup>†</sup> | Turtle Pits<br>2005 <sup>**</sup> | Turtle Pits<br>2006 <sup>**</sup> | Sisters<br>Peak <sup>**</sup> | Brandon<br>brine <sup>††</sup> | Brandon<br>vapor <sup>††</sup> | Kairei 4<br>§§  | Kairei 6 <sup>§§</sup> | Edmond<br>2 <sup>§§</sup> | Edmond<br>10 <sup>§§</sup> |
|-----------------------|--------------------------------|--------------------------------------|-------------------------------------------|----------------------|------------------------|----------------------------|-----------------------------|-----------------------|------------------|-----------------------|-----------------------------------|-----------------------------------|-------------------------------|--------------------------------|--------------------------------|-----------------|------------------------|---------------------------|----------------------------|
| Sampling<br>depth, m  | 1540                           | 1687                                 | 1726                                      | 2300                 | 2950                   | 850                        | 3090                        | 3480                  | 3650             | 3000                  | 3000                              | 3000                              | 3000                          | 2834                           | 2834                           | 2452            | 2452                   | 3300                      | 3303                       |
| T°C                   | 328                            | 325                                  | 281                                       | 365                  | 353                    | 271                        | 360                         | 341                   | 366              | 349                   | 405                               | 407                               | 400                           | 376                            | 405                            | 315             | 365                    | 273                       | 293                        |
| pH                    | 3.5                            | 4.1                                  | 4.2                                       | 2.8                  | 3.3                    | 4.4                        | N.D.                        | 3.7                   | 3.4              | N.D.                  | N.D.                              | N.D.                              | N.D.                          | 3.3                            | <3.7                           | 3.35            | 3.62                   | <3.02                     | ≤2.97                      |
| Cl (mM)               | 624                            | 438                                  | 535                                       | 750                  | 515                    | 400                        | 469                         | 550                   | 636              | 552                   | 291                               | 271                               | 224                           | 557                            | 338                            | 571             | 620                    | 929                       | 926                        |
| Na (mM)               | 499                            | 386                                  | 431                                       | 553                  | 438                    | 313                        | 420                         | 515                   | 557              | 480                   | 230                               | 237                               | 209                           | 441                            | 303                            | 492             | 528                    | 698                       | 718                        |
| K (mM)                | 27                             | 21                                   | 29                                        | 20                   | 22                     | 24                         | 19                          | 23                    | 17               | 20                    | 8                                 | 9                                 | 7                             | 14                             | 9                              | 13              | 15                     | 45                        | 45                         |
| Ca (mM)               | 47                             | 30                                   | 35                                        | 67                   | 28                     | 33                         | 12                          | 11                    | 31               | 19                    | 8-11                              | 9                                 | 12-17                         | 33                             | 21                             | 29              | 31                     | 58                        | 65                         |
| SiO <sub>2</sub> (mM) | 15                             | 16                                   | 15                                        | 7                    | 8                      | 11                         | N.D.                        | 20                    | 21               | 22                    | 11                                | 12                                | 14                            | 13                             | 9                              | 17              | 17                     | 20                        | 19                         |
| Mg (mM)               | 0 <sup>##</sup>                | 0 <sup>##</sup>                      | 0 <sup>##</sup>                           | 0 <sup>##</sup>      | 0 <sup>##</sup>        | 0 <sup>##</sup>            | 0 <sup>##</sup>             | 0 <sup>##</sup>       | 0 <sup>##</sup>  | 0 <sup>##</sup>       | 0 <sup>##</sup>                   | 0 <sup>##</sup>                   | 0 <sup>##</sup>               | 0 <sup>##</sup>                | 0 <sup>##</sup>                | 0 <sup>##</sup> | 0 <sup>##</sup>        | 0 <sup>##</sup>           | 0 <sup>##</sup>            |
| Al (μM)               | N.D.                           | (4-11)                               | N.D.                                      | 2                    | 4                      | 6                          | N.D.                        | 12                    | 10               | N.D.                  | N.D.                              | N.D.                              | N.D.                          | N.D.                           | N.D.                           | 4.35            | 5.29                   | 7.28                      | 19.1                       |
| Ba (μM)               | 26                             | (>8)                                 | N.D.                                      | >67                  | >4.5                   | >12                        | >21                         | >4                    | 19               | N.D.                  | N.D.                              | N.D.                              | N.D.                          | N.D.                           | N.D.                           | N.D.            | N.D.                   | N.D.                      | N.D.                       |
| Sr (μM)               | 192                            | 77                                   | 91                                        | 200                  | 138                    | 108                        | 45                          | 54                    | 99               | 63                    | 28                                | 25                                | 35-52                         | 94                             | 63                             | 70              | 80                     | 165                       | 182                        |
| B (μM)                | 590                            | N.D.                                 | N.D.                                      | N.D.                 | N.D.                   | N.D.                       | N.D.                        | N.D.                  | N.D.             | 520                   | 536                               | 547                               | 591                           | 465                            | 431                            | N.D.            | N.D.                   | N.D.                      | N.D.                       |
| Li (μM)               | 636                            | 303                                  | 356                                       | 340                  | 245                    | 280                        | 1030                        | 835                   | 850              | 1217                  | 416                               | 427                               | 343                           | 488                            | 335                            | 553             | 545                    | 1080                      | 1070                       |
| Br (μM)               | 956                            | N.D.                                 | N.D.                                      | N.D.                 | N.D.                   | N.D.                       | N.D.                        | N.D.                  | N.D.             | 873                   | 494                               | 482                               | 392                           | 890                            | 680                            | 920             | 970                    | 1440                      | 1390                       |
| I (μM)                |                                | N.D.                                 | N.D.                                      | N.D.                 | N.D.                   | N.D.                       | N.D.                        | N.D.                  | N.D.             | N.D.                  | N.D.                              | N.D.                              | N.D.                          | N.D.                           | N.D.                           | N.D.            | N.D.                   | N.D.                      | N.D.                       |
| Fe (μM)               | 1065                           | 623                                  | 56                                        | 24000                | 2500                   | 18                         | 1970                        | 2400                  | 5590             | 803                   | 3120                              | 3940                              | 3380                          | 12300                          | 8680                           | 3540            | 6010                   | 10500                     | 13100                      |
| Cu (μM)               | 10                             | (<2-30)                              | N.D.                                      | 140                  | 27                     | <2                         | 43                          | 35                    | 140              | 5                     | 111                               | 9-76                              | 110-374                       | 105                            | 51                             | 276             | 118                    | 146                       | 403                        |
| Zn (μM)               | 111                            | (<2-40)                              | N.D.                                      | 160                  | 29                     | <2                         | 72                          | 53                    | 46               | 60                    | 55                                | 28-69                             | 50-155                        | 121                            | 81                             | 67              | 85                     | 122                       | 149                        |
| Mn (μM)               | 1150                           | 267                                  | 73                                        | 2250                 | 330                    | 68                         | 254                         | 400                   | 680              | 730                   | 454                               | 473                               | 704                           | 1300                           | 790                            | 811             | 857                    | 1450                      | 1430                       |
| Ni (μM)               | N.D.                           | (<2)                                 | N.D.                                      | 3                    | <2                     | <2                         | N.D.                        | <2                    | <2               | N.D.                  | N.D.                              | N.D.                              | N.D.                          | N.D.                           | N.D.                           | N.D.            | N.D.                   | N.D.                      | N.D.                       |
| As (μM)               | N.D.                           | N.D.                                 | N.D.                                      | N.D.                 | N.D.                   | N.D.                       | N.D.                        | N.D.                  | N.D.             | N.D.                  | N.D.                              | N.D.                              | N.D.                          | N.D.                           | N.D.                           | N.D.            | N.D.                   | N.D.                      | N.D.                       |
| Pb (μM)               | 0.3                            | (0.035-0.130)                        | N.D.                                      | 0.1                  | 0.1                    | 0.1                        | N.D.                        | 0.3                   | 0.1              | 0.4                   | 0.2                               | 0.1-0.2                           | 0.1-0.4                       | N.D.                           | N.D.                           | N.D.            | 0.3                    | 0.3                       | 1.3                        |
| Cd (μM)               | N.D.                           | (0.018-0.079)                        | N.D.                                      | 0.13                 | 0.063                  | 0.01                       | N.D.                        | 0.44                  | 0.07             | N.D.                  | N.D.                              | N.D.                              | N.D.                          | N.D.                           | N.D.                           | 0.07            | 0.11                   | 0.22                      | 0.28                       |
| Cr (nM)               | N.D.                           | N.D.                                 | N.D.                                      | N.D.                 | N.D.                   | N.D.                       | N.D.                        | N.D.                  | N.D.             | N.D.                  | N.D.                              | N.D.                              | N.D.                          | N.D.                           | N.D.                           | N.D.            | N.D.                   | N.D.                      | N.D.                       |
| Ag (nM)               | N.D.                           | (5-25)                               | N.D.                                      | 47                   | 11                     | 17                         | N.D.                        | 31                    | 51               | N.D.                  | N.D.                              | N.D.                              | N.D.                          | N.D.                           | N.D.                           | N.D.            | N.D.                   | N.D.                      | N.D.                       |
| V (nM)                | N.D.                           | N.D.                                 | N.D.                                      | N.D.                 | N.D.                   | N.D.                       | N.D.                        | N.D.                  | N.D.             | N.D.                  | N.D.                              | N.D.                              | N.D.                          | N.D.                           | N.D.                           | N.D.            | N.D.                   | N.D.                      | N.D.                       |
| Sb (nM)               | N.D.                           | (<3-6)                               | N.D.                                      | 3                    | <3                     | 5                          | N.D.                        | 11                    | 4                | N.D.                  | N.D.                              | N.D.                              | N.D.                          | N.D.                           | N.D.                           | N.D.            | N.D.                   | N.D.                      | N.D.                       |
| Mo (nM)               | N.D.                           | (3-84)                               | N.D.                                      | 2                    | 1                      | 10                         | N.D.                        | 3                     | 5                | 16                    | 101                               | 15-57                             | 80-270                        | N.D.                           | N.D.                           | N.D.            | N.D.                   | N.D.                      | N.D.                       |
| Te (nM)               | N.D.                           | N.D.                                 | N.D.                                      | N.D.                 | N.D.                   | N.D.                       | N.D.                        | N.D.                  | N.D.             | N.D.                  | N.D.                              | N.D.                              | N.D.                          | N.D.                           | N.D.                           | N.D.            | N.D.                   | N.D.                      | N.D.                       |
| Se (nM)               | N.D.                           | N.D.                                 | N.D.                                      | N.D.                 | N.D.                   | N.D.                       | N.D.                        | N.D.                  | <400             | N.D.                  | N.D.                              | N.D.                              | N.D.                          | N.D.                           | N.D.                           | N.D.            | N.D.                   | N.D.                      | N.D.                       |
| Tl (nM)               | N.D.                           | (7-16)                               | N.D.                                      | 9                    | 7                      | 11                         | N.D.                        | 25                    | 13               | N.D.                  | N.D.                              | N.D.                              | N.D.                          | N.D.                           | N.D.                           | N.D.            | N.D.                   | N.D.                      | N.D.                       |
| W (nM)                | N.D.                           | N.D.                                 | N.D.                                      | N.D.                 | N.D.                   | N.D.                       | N.D.                        | N.D.                  | N.D.             | N.D.                  | N.D.                              | N.D.                              | N.D.                          | N.D.                           | N.D.                           | N.D.            | N.D.                   | N.D.                      | N.D.                       |
| Au (nM)               | N.D.                           | N.D.                                 | N.D.                                      | N.D.                 | N.D.                   | N.D.                       | N.D.                        | N.D.                  | N.D.             | N.D.                  | N.D.                              | N.D.                              | N.D.                          | N.D.                           | N.D.                           | N.D.            | N.D.                   | N.D.                      | N.D.                       |
| Sn (nM)               | N.D.                           | N.D.                                 | N.D.                                      | N.D.                 | N.D.                   | N.D.                       | N.D.                        | N.D.                  | N.D.             | N.D.                  | N.D.                              | N.D.                              | N.D.                          | N.D.                           | N.D.                           | N.D.            | N.D.                   | N.D.                      | N.D.                       |
| Hg (nM)               | N.D.                           | N.D.                                 | N.D.                                      | N.D.                 | N.D.                   | N.D.                       | N.D.                        | N.D.                  | N.D.             | N.D.                  | N.D.                              | N.D.                              | N.D.                          | N.D.                           | N.D.                           | N.D.            | N.D.                   | N.D.                      | N.D.                       |

Note: H<sub>2</sub>S concentrations for these fluids range from 0.8 to 11.2 mM, averaging ~4.7 mM. N.D. No data.

\* Butterfield et al., 1990.

† Von Damm et al., 1998.

<sup>§</sup> Douville et al., 2002.

<sup>#</sup> Douville et al., 2002; Hannington et al., 2005.

<sup>\*\*</sup> Koschinsky et al., 2008

<sup>††</sup> Von Damm et al., 2003.

<sup>§§</sup> Gallant and Von Damm, 2006.

<sup>##</sup> Assumed by authors to be 0 for calculation.
